# Supplementary material for: Histological Patterns and Mammographic Presentation of Invasive Lobular Carcinoma Show No Obvious Associations
Source: MDPI journal article supplement (doi:10.3390/cancers16091640), 2024-04-24
Supplement: s1 [file s1]

**Table S1:** Clinical and pathological features of the tumors assessed

|                          | All          | Radiology review | Pathology review | Radio-Pathology correlation |
|--------------------------|--------------|------------------|------------------|-----------------------------|
| Number                   | 146          | 141              | 136              | 132                         |
| Age: mean (range) years  | 63.8 (40-91) | 64.1 (40-91)     | 64.1 (40-91)     | 64.3 (40-91)                |
| Laterality L/R           | 74/72        | 71/70            | 68/68            | 66/66                       |
| Histological grade 1/2/3 | 3/133/10     | 3/129/9          | 3/123/8          | 3/122/7                     |
| (y)pT categories         |              |                  |                  |                             |
| pT1mi - pT1a             | 4            | 3                | 2                | 1                           |
| pT1b                     | 14           | 14               | 13               | 13                          |
| pT1c                     | 59           | 57               | 57               | 55                          |
| pT2                      | 49           | 48               | 47               | 46                          |
| pT3                      | 19           | 18               | 17               | 17                          |
| pT4b                     | 1            | 1                | 0                | 0                           |
| pN categories            |              |                  |                  |                             |
| pN0                      | 87           | 84               | 82               | 79                          |
| pN1                      | 35           | 34               | 34               | 33                          |
| pN2                      | 11           | 11               | 10               | 10                          |
| pN3                      | 11           | 10               | 8                | 8                           |
| pNx                      | 2            | 2                | 2                | 2                           |
